# Supplementary material
Source: Springer Nature journal article supplement (https://www.springermedizin.de/resource/supplementary/12985_2009_748_MOESM2_ESM.pdf/9609016)

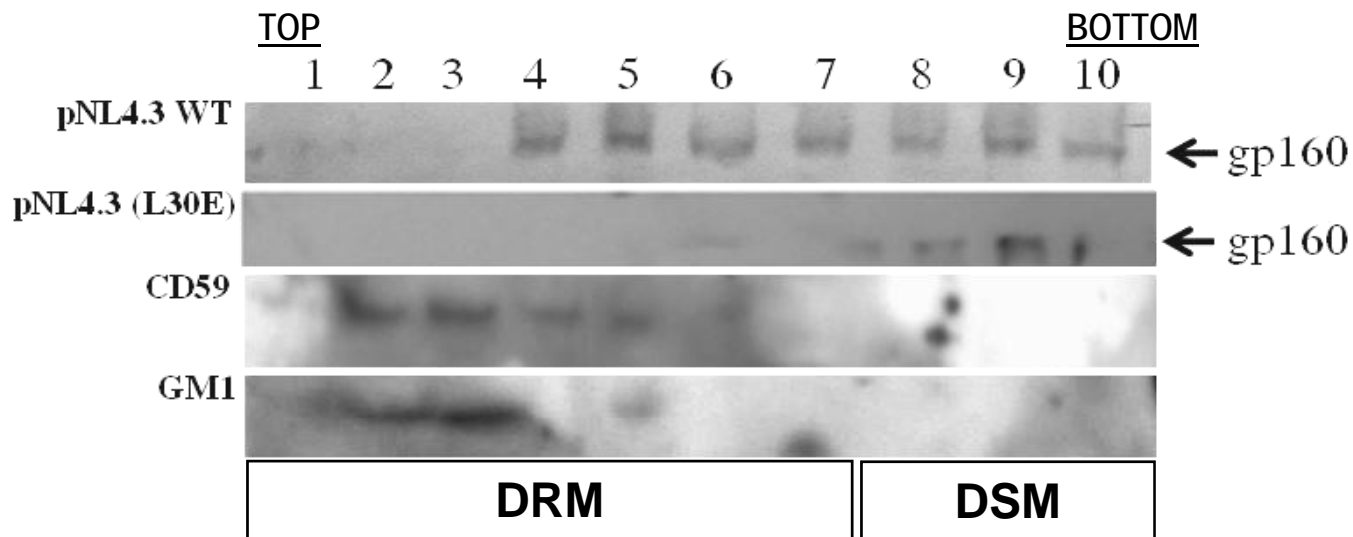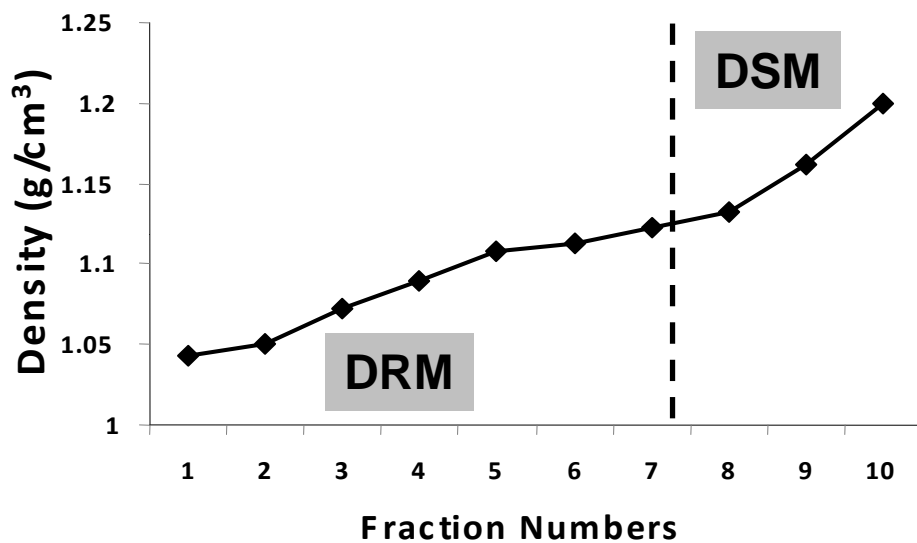

Supplement: MOESM2 [file 9609016]
